# Supplementary material for: Awareness, Knowledge and Attitude towards ‘Superfood’ Kale and Its Health Benefits among Arab Adults
Source: MDPI journal article supplement (doi:10.3390/nu14020245), 2022-01-07
Supplement: s1 [file s1]

# Awareness, Knowledge and Attitude towards Kale and Its Health Benefits According to the Socioeconomic Status in Saudi Adults

Hanan A. Alfawaz, Kaiser Wani, Haya Alrakayan, Abdullah M. Alnaami and Nasser M. Al-Daghri

**Supplementary Table S1:** Kale knowledge questionnaire responses.

|                                                                                      | All        | Male       | Female     | P    |
|--------------------------------------------------------------------------------------|------------|------------|------------|------|
| N                                                                                    | 1200       | 476        | 724        |      |
| Q1. Is Kale considered a high calorie food?                                          |            |            |            |      |
| Yes                                                                                  | 9 (0.8)    | 2 (0.4)    | 7 (0.9)    | 0.15 |
| No                                                                                   | 722 (60.2) | 274 (57.6) | 448 (61.9) |      |
| Don't know                                                                           | 469 (39.1) | 200 (42)   | 269 (37.2) |      |
| Q2. Is Kale considered a high nutritional value food?                                |            |            |            |      |
| Yes                                                                                  | 761 (63.4) | 285 (59.9) | 476 (65.6) | 0.11 |
| No                                                                                   | 11 (0.9)   | 4 (0.8)    | 7 (1)      |      |
| Don't know                                                                           | 428 (35.7) | 187 (39.3) | 241 (33.3) |      |
| Q3. Is Kale considered a food with antioxidant property?                             |            |            |            |      |
| Yes                                                                                  | 358 (29.8) | 128 (26.9) | 230 (31.8) | 0.07 |
| No                                                                                   | 401 (33.4) | 147 (30.9) | 254 (35.1) |      |
| Don't know                                                                           | 441 (36.8) | 201 (42.2) | 240 (33.1) |      |
| Q4. Is Kale considered a food with immune boost property?                            |            |            |            |      |
| Yes                                                                                  | 685 (57.1) | 261 (54.8) | 424 (58.6) | 0.31 |
| No                                                                                   | 5 (0.4)    | 4 (0.8)    | 3 (0.4)    |      |
| Don't know                                                                           | 508 (42.3) | 211 (44.3) | 297 (41.0) |      |
| Q5. Does excessive eating of Kale cause constipation?                                |            |            |            |      |
| Yes                                                                                  | 138 (11.5) | 63 (13.2)  | 75 (10.4)  | 0.06 |
| No                                                                                   | 282 (23.5) | 97 (20.4)  | 185 (25.5) |      |
| Don't know                                                                           | 780 (65)   | 316 (66.4) | 464 (64.1) |      |
| Q6. Is Kale considered a food rich in fibers?                                        |            |            |            |      |
| Yes                                                                                  | 663 (55.3) | 242 (50.8) | 421 (58.1) | 0.02 |
| No                                                                                   | 17 (1.4)   | 5 (1.1)    | 12 (1.7)   |      |
| Don't know                                                                           | 520 (43.3) | 229 (48.1) | 291 (40.2) |      |
| Q7. Is Kale considered a food rich in Vitamin C?                                     |            |            |            |      |
| Yes                                                                                  | 374 (31.2) | 138 (29)   | 236 (32.6) | 0.37 |
| No                                                                                   | 111 (9.3)  | 43 (9)     | 68 (9.4)   |      |
| Don't know                                                                           | 715 (59.6) | 295 (62)   | 420 (58.0) |      |
| Q8. Is Kale consumption considered bad for people suffering from digestive problems? |            |            |            |      |

|                                                                               |            |            |            |        |
|-------------------------------------------------------------------------------|------------|------------|------------|--------|
| Yes                                                                           | 164 (13.7) | 76 (16)    | 88 (12.2)  | 0.05   |
| No                                                                            | 236 (19.7) | 81 (17)    | 155 (21.4) |        |
| Don't know                                                                    | 800 (66.7) | 319 (67)   | 481 (66.4) |        |
| Q9. Is Kale consumption considered a food with anti-carcinogenic properties?  |            |            |            |        |
| Yes                                                                           | 206 (17.2) | 80 (16.8)  | 126 (17.4) | 0.88   |
| No                                                                            | 115 (9.6)  | 48 (10.1)  | 67 (9.3)   |        |
| Don't know                                                                    | 879 (73.3) | 348 (73.1) | 531 (73.3) |        |
| Q10. Is Kale consumption considered a food with anti-inflammatory properties? |            |            |            |        |
| Yes                                                                           | 228 (19)   | 92 (19.3)  | 136 (18.8) | 0.92   |
| No                                                                            | 90 (7.5)   | 37 (7.8)   | 53 (7.3)   |        |
| Don't know                                                                    | 882 (73.5) | 347 (72.9) | 535 (73.9) |        |
| Q11. Is Kale consumption considered a food high in fats?                      |            |            |            |        |
| Yes                                                                           | 22 (1.8)   | 5 (1.1)    | 17 (2.3)   | 0.19   |
| No                                                                            | 693 (57.8) | 271 (56.9) | 422 (58.3) |        |
| Don't know                                                                    | 485 (40.4) | 200 (42)   | 285 (39.4) |        |
| Q12. Does Kale play a role in controlling chronic diseases?                   |            |            |            |        |
| Yes                                                                           | 358 (29.8) | 151 (31.7) | 207 (28.6) | 0.47   |
| No                                                                            | 50 (4.2)   | 18 (3.8)   | 32 (4.4)   |        |
| Don't know                                                                    | 792 (66)   | 307 (64.5) | 485 (67.0) |        |
| Q13. Does the nutritional value of Kale increase after cooking?               |            |            |            |        |
| Yes                                                                           | 303 (25.3) | 142 (29.8) | 161 (22.2) | <0.001 |
| No                                                                            | 193 (16.1) | 55 (11.6)  | 138 (19.1) |        |
| Don't know                                                                    | 704 (58.7) | 279 (58.6) | 425 (58.7) |        |

**Note:** The data was presented as frequency (%).The difference between males and females was calculated by chi-squared test.

**Supplementary Table S2.** Average nutritional content of one cup of kale.

|                |        | Amount in 1 cup | Average RDI | Average RDI satisfied (%) |
|----------------|--------|-----------------|-------------|---------------------------|
| energy         | (kcal) | 49              | 2400        | 2.04                      |
| Macronutrients |        |                 |             |                           |
| Carbohydrate   | (g)    | 8.75            | 130         | 6.73                      |
| Dietary Fibers | (g)    | 3.6             | 28          | 12.86                     |
| protein        | (g)    | 4.28            | 51          | 8.39                      |
| Total fats     | (g)    | 0.93            | 65          | 1.43                      |
| Minerals       |        |                 |             |                           |
| Ca             | (mg)   | 150             | 1100        | 13.64                     |
| Fe             | (mg)   | 1.47            | 13          | 11.31                     |
| Mg             | (mg)   | 47              | 370         | 12.7                      |
| P              | (mg)   | 92              | 700         | 13.14                     |
| K              | (mg)   | 491             | 4700        | 10.45                     |
| Na             | (mg)   | 38              | 1400        | 2.71                      |
| Zn             | (mg)   | 0.56            | 9.5         | 5.89                      |
| Cu             | (mg)   | 0.8             | 900         | 0.09                      |
| Mn             | (mg)   | 0.6             | 2.05        | 29.27                     |
| Vitamins       |        |                 |             |                           |
| Vitamin C      | (mg)   | 21              | 82.5        | 25.45                     |
| thiamin        | (mg)   | 0.11            | 1.15        | 9.57                      |
| riboflavin     | (mg)   | 0.13            | 1.15        | 11.3                      |
| niacin         | (mg)   | 1               | 15          | 6.67                      |
| B-6            | (mg)   | 0.271           | 1.5         | 18.07                     |
| folate         | (mg)   | 141             | 400         | 35.25                     |
| Vitamin A      | (mg)   | 172             | 1150        | 14.96                     |
| Vitamin E      | (mg)   | 1.54            | 15          | 10.27                     |
| Vitamin K      | (mg)   | 494             | 150         | 329.33                    |

**Note:** The data was drawn from USDA website available at <https://ndb.nal.usda.gov/ndb>. The nutritional requirements are estimated for an average adult and may vary according to age and sex.
